# Supplementary material
Source: Springer Nature journal article supplement (https://www.springermedizin.de/resource/supplementary/12885_2007_955_MOESM3_ESM.pdf/9471136)
Supplement: MOESM3 [file 9471136]

|     |               | MIP COPY NUMBER |        | qRT-PCR |      | IHC  |     |     |                                                 |
|-----|---------------|-----------------|--------|---------|------|------|-----|-----|-------------------------------------------------|
| #   | Pathology     | C-MYC           | PIK3CA | PIK3CA  | PTEN | p21  | p53 | WT1 | Classification                                  |
| 186 | Ser/Undiff-HG | 2.4             | 2.7    | 1.68    | 0.58 | 0    | 0   | 2   | BRCA1 loss through germline or somatic mutation |
| 223 | Serous - HG   | 5.8             | 2.5    | 0.48    | 0.32 | 0    | 1   | 2   |                                                 |
| 329 | Serous - HG   | 3.4             | 2.0    | 0.1     | 0.11 | 0    | 1   | 2   |                                                 |
| 293 | Serous - HG   | 2.6             | 2.4    | 1.05    | 0.94 | 1    | 0   | 2   |                                                 |
| 283 | Serous - HG   | 3.3             | 2.0    | 0.62    | 0.55 | 0    | 1   | 2   |                                                 |
| 239 | Serous - HG   | 3.0             | 2.3    | 0.33    | 0.45 | 0    | 0   | 0   |                                                 |
| 336 | Ser/Undiff-HG | 9.6             | 1.7    | 0.12    | 0.06 | 1    | 0   | 0   |                                                 |
| 327 | Serous - HG   | 2.0             | 2.4    | 0.07    | 0.1  | 0    | 1   | 2   |                                                 |
| 379 | Serous - HG   | 3.6             | 2.0    | 0.68    | 0.33 | 1    | 0   | 2   |                                                 |
| 217 | Serous - HG   | NA              | NA     | 1.18    | 1.14 | 0    | 1   | 2   |                                                 |
| 330 | Serous - HG   | 2.9             | 3.2    | 0.42    | 0.52 | 0    | 1   | 2   |                                                 |
| 332 | Serous - HG   | 5.1             | 4.9    | 2.08    | 0.99 | 0    | 1   | 2   |                                                 |
| 388 | Serous - HG   | 3.2             | 2.9    | 1.12    | 0.67 | 0    | 1   | 2   |                                                 |
| 363 | Serous - HG   | 5.0             | 3.6    | 3.31    | 1.37 | 0    | 0   | 2   |                                                 |
| 161 | Ser/Undiff-HG | 2.5             | 3.0    | 1.02    | 0.39 | 0    | 1   | 2   |                                                 |
| 344 | Serous - HG   | 3.0             | 3.3    | 1.6     | 0.89 | 0    | 1   | 2   |                                                 |
| 345 | Serous - HG   | 5.8             | 3.9    | 2.02    | 0.39 | 0    | 1   | 2   |                                                 |
| 384 | Serous - HG   | 3.8             | 3.2    | 2.53    | 2.69 | 0    | 1   | 2   |                                                 |
| 178 | Serous - HG   | 5.7             | 2.8    | 2.64    | 0.75 | 0    | 1   | 2   | Equivocal BRCA1 loss                            |
| 229 | Serous - HG   | 4.2             | 3.1    | 0.29    | 0.32 | 0    | 1   | 2   |                                                 |
| 309 | Serous - HG   | 1.9             | 2.2    | 1.18    | 2.2  | N.A. | 0   | 2   |                                                 |
| 394 | Serous - HG   | 2.4             | 2.2    | 1.05    | 0.72 | 0    | 0   | 2   |                                                 |
| 201 | Ser/Undiff-HG | 2.7             | 2.9    | 0.75    | 2.65 | 0    | 1   | 2   |                                                 |
| 195 | Serous - HG   | 3.9             | 2.1    | 1.09    | 2.71 | 0    | 1   | 2   | High grade carcinoma without BRCA1 loss         |
| 236 | Serous - HG   | 3.3             | 2.7    | 1.22    | 0.94 | 0    | 0   | 2   |                                                 |
| 280 | Ser/Undiff-HG | 7.7             | 3.1    | 2.18    | 0.66 | 1    | 1   | 2   |                                                 |
| 172 | Serous - HG   | 2.1             | 1.8    | 0.86    | 0.74 | 1    | 0   | 0   |                                                 |
| 254 | Serous - HG   | 2.9             | 2.0    | 0.38    | 0.58 | 0    | 0   | 2   |                                                 |
| 319 | Serous - HG   | 3.2             | 1.9    | 0.4     | 0.75 | 1    | 0   | 2   |                                                 |
| 372 | Serous - HG   | 4.0             | 3.6    | 2.89    | 1.36 | 1    | 0   | 1   |                                                 |
| 208 | Undiff - HG   | 4.9             | 3.7    | 1.03    | 1.06 | 0    | 0   | 2   |                                                 |
| 273 | Undiff - HG   | 3.9             | 1.9    | 0.33    | 0.39 | 0    | 1   | 1   |                                                 |
| 240 | Undiff - HG   | 2.8             | 2.2    | 0.36    | 0.47 | 1    | 0   | 0   |                                                 |
| 297 | Serous - HG   | 2.0             | 2.2    | 2.06    | 3.14 | 0    | 0   | 2   |                                                 |
| 366 | Serous - HG   | NA              | NA     | 0.83    | 0.66 | 0    | 1   | 2   |                                                 |
